# Supplementary material
Source: publisher site journal article supplement (https://www.dovepress.com/article/447848)
Supplement: Supplementary file 1 [file get_supplementary_file.php]

**Title**: Macroscopic Characterization of Hepatocellular Carcinoma: An Underexploited Source of Prognostic Factors

**Authors**: Stéphanie Gonvers (1, 2), Sebastiao N. Martins-Filho (3), André Hirayama (4), Julien Calderaro (5), Rebecca Philips (3), Emilie Uldry (1, 2), Nicolas Demartines (1, 2), Emmanuel Melloul (1, 2), Young Nyun Park (7), Valérie Paradis (6), Swan N. Thung (8), Venancio Alves (4), Christine Sempoux (2, 9), Ismail Labgaa (1, 2)*

**Affiliations**:

1. Department of Visceral Surgery, University Hospital of Lausanne (CHUV, Lausanne, Switzerland).

2. Faculty of Biology & Medicine (FBM), University of Lausanne (UNIL), Lausanne, Switzerland.

3. Department of Laboratory Medicine and Pathology, University of Alberta, Edmonton, Alberta, Canada.

4. Department of Pathology, Faculdade de Medicina FMUSP, Universidade de Sao Paulo, Sao Paulo, Brazil.

5. Department of Pathology, APHP, Henri Mondor University Hospital, Creteil, Val-de-Marne, France.

6. Department of Pathology, APHP, Beaujon University Hospital, Clichy, France.

7. Department of Pathology, Severance Hospital, Yonsei University College of Medicine, Seoul, Republic of Korea.

8. Department of Pathology, Molecular and Cell Based Medicine, Icahn School of Medicine at Mount Sinai, New York, NY, USA.

9. Department of Pathology, University Hospital of Lausanne (CHUV, Lausanne, Switzerland).

*** Corresponding author:**

Ismail Labgaa, M.D., Ph.D.

Department of Visceral Surgery

University Hospital of Lausanne (CHUV)

Rue du Bugnon 46

CH-1011 Lausanne, Switzerland

M: +41 (0)79 556 68 47

E: ismail.labgaa@chuv.ch

Twitter: LabgaaI

ORCID: 0000-0003-4286-2170

**Table of Contents**

- Table S1…………………………………………………………………………………4-12

- Table S2………………………………………………………………………………..13-18

- Table S3………………………………………………………………………………..19-25

- Table S4………………………………………………………………………………..26-27

- Table S5………………………………………………………………………………..28-33

- Table S6………………………………………………………………………………..34-36

- Table S7………………………………………………………………………………..37-38

- Table S8……………………………………………………………………………………39

- Table S9……………………………………………………………………………………40

- References…………………………………………………………………………….41-45

**Table S1**. Tumor size (TS) and prognosis in hepatocellular carcinoma (HCC)

| Study | Treatment (Number of patients) | Main finding(s) |
| --- | --- | --- |
| Zhang et al, 2022 [1] | LR (698)  *HCCs without MaVi* | - TS of 5-10 and > 10 cm was a prognostic factor of early recurrence in the training cohort (OR, 2.84; 95% CI, 1.82-4.41; p<0.001 and OR, 1.72; 95% CI, 1.20-2.46; p=0.003). - TS was included in nomograms that showed predictive accuracy of recurrence in both training and validation cohorts. |
| Jung et al, 2018 [2] | LR (628)  *Solitary Child-Pugh A HCCs* | - TS > 3 cm was a prognostic factor of early recurrence (OR, 2.24; 95% CI, 1.36-3.69; p=0.001). - It was not a prognostic factor of poorer OS. |
| Roayaie et al, 2004 [3] | **LT (311)**  - recurrent HCCs (57) | TS* was a prognostic factor of time to recurrence (ExpB, 1.2; 95% CI, 1.02-1.22; p=0.017). |
| Parfitt et al, 2007 [4] | **LT (75)** | TS* was a prognostic factor of recurrence (OR, 1.98; 95% CI, 1.25-3.15; p=0.004). |
| Ochiai et al, 2012 [5] | LR (264)  *R0 HCCs* | - TS* was the only prognostic factor of extrahepatic recurrence (RR, 1.03; 95% CI, 1.01-1.05; p=0.001). - The best cut-off for predicting extrahepatic metastasis was found to be 6 cm (specificity=0.89; sensitivity=0.58). |
| Pérez-Saborido et al, 2007 [6] | **LT (95)** | - TS* predicted overall and extrahepatic recurrence on univariate analysis (p=0.004). - It did not predict hepatic recurrence on univariate analysis. |
| Welling, 2018 [7] | **LT (441)** | - TS* on explant was a prognostic factor of recurrence (HR 1.73, p<0.05). |
| Yamamoto et al, 2015 [8] | LR (404)  - recurrence-free patients after 17 months (252) | - TS ≥ 5 cm was not a prognostic factor of early recurrence after initial hepatectomy. - TS did not predict late recurrence nor 5-year OS after initial recurrence on univariate analysis. |
| Shah et al, 2006 [9] | LR (56) | TS > 5 cm was not a prognostic factor of early recurrence (HR, 1.42; 95% CI, 0.81-4.67; p=0.19). |
| Du et al, 2014 [10] | LR (398) | TS of 3-10 or ≥ 10cm was not a prognostic factor of neither early nor late recurrence. |
| D’Amico et al, 2009 [11] | **LT (479)** | TS* nor the sum of the tumor diameters were predictive of recurrence after LT (HR, 1.01; 95% CI, 0.88-1.19; p=0.72 and HR, 1.07; 95% CI, 0.95-1.20; p=0.24, respectively). |
| Xu et al, 2019 [12] | LR (734) | - TS > 5 cm was a prognostic factor of late recurrence (HR, 1.49; 95% CI, 1.10-2.00; p=0.009). |
| Minagawa et al, 2007 [13] | LR (13 566) | - TS > 2 cm was a prognostic factor of poor OS (RR, 1.21; 95% CI, 1.14-1.28; p<0.0001). |
| Meng et al, 2014 [14] | LR (413)  - BDI group (35) | - TS ≥ 5 cm was a prognostic factor of poor OS (RR, 1.7; 95% CI 1.3-2.2; p<0.001). - Large nodules were predominant in the bile duct invasion group (p=0.004). |
| Vauthey et al, 2002 [15] | LR (557) | - TS ≥ 5 cm was a prognostic factor of poor OS (HR, 1.4; 95% CI, 1.1-1.9; p=0.01). - Subgroup analyses: TS had no effect on the survival of patients with single tumors without vascular invasion, with microvascular invasion, and patients with multiple tumors with macrovascular invasion. However, it had an effect on the survival on patients with multiple tumors (p=0.007). |
| Poon et al, 2003 [16] | LR (542) | - TS > 5 cm was a prognostic factor of poor OS (HR, 1.53; 95% CI, 1.10-2.21; p=0.01). - Cut-off value in the prognostic classification should be shifted from 2 to 5 cm, for patients with multiple tumors. |
| Liu et al, 2016 [17] | LR (549) | - TS > 5 cm was a prognostic factor of OS (OR, 2.00; 95% CI, 1.44-2.78; p<0.001) and DFS (OR, 1.49; 95% CI, 1.13-2.08; p=0.01). |
| Shinkawa et al, 2020 [18] | LR (638)  *Solitary HCCs without MaVI* | - TS ≥ 5 cm was a prognostic factor of CSS (HR, 1.41; 95% CI, 1.01-1.97; p=0.001). - It was not for DFS. However, cumulative recurrence rate within 2 years was higher in the TS > 5 cm group (p=0.003). - Subgroup analysis: same results for the subgroup without microvascular invasion. |
| El-Assal et al, 1997 [19] | LR (137) | - TS of 2-5 and > 5 cm was a prognostic factor of DFS (OR, 1.07; p=0.025). |
| Shah et al, 2007 [20] | **LT (155)** | - TS* was a prognostic factor of DFS (HR, 0.47; 95% CI, 0.14-1.61; p=0.04). - TS was associated with vascular invasion (p=0.04). |
| Shimada et al, 2007 [21] | LR (319) | - TS > 4 cm was a prognostic factor of DFS (HR, 1.62; 95% CI, 1.19-2.20; p=0.002). - It did not predict OS after recurrence on univariate analysis. |
| Sumie et al, 2014 [22] | LR (207) | - TS > 3 cm was a prognostic factor of DSS (HR, 2.41; 95% CI, 1.36-4.27; p=0.003). - It was not for DFS. |
| Goh et al, 2016 [23] | LR (560)  *Solitary HCCs* | - TS* was a prognostic factor of DFS (HR, 1.08; 95% CI, 1.05-1.11; p<0.001). - It was not a prognostic factor of OS (HR, 1.03; 95% CI, 1.00-1.06; p=0.1). - Subgroup analyses: TS had an effect on the survival of patients with single tumors with microvascular invasion but not for patients with single tumors without microvascular invasion. |
| Lee et al, 2017 [24] | LR (520)  **LT (338)**  - AJCC Stage I-II HCCs (710) | - TS > 5 cm was a prognostic factor of DFS for stage I-II HCCs (HR, 1.29; 95% CI, 1.03-1.62; p=0.03). - For stages I-II, intrahepatic recurrence was predominant in the LR group (p<0.001). |
| Park et al, 2009 [25] | LR (213)  *Child-Pugh A patients meeting Milan criteria* | - TS > 5 cm was a prognostic factor of DFS (OR, 4.15; 95% CI, 2.12-8.11; p<0.00). - It did not predict recurrence on univariate analysis. |
| Iwatsuki et al, 2000 [26] | **LT (344)** | - TS of 2-5 and > 5 cm was a prognostic factor of DFS (RR, 4.5; 95% CI, 1.5-13.0; p<0.0003 and RR, 6.7; 95% CI, 2.2-19.9; p<0.0003). |
| Tsai et al, 2000 [27] | LR (322) | - TS ≥ 3 cm was a prognostic factor of poor OS (RR, 1.44; p=0.003). - It correlated with the incidence of venous invasion (p<0.001). |
| Roayaie et al, 2013 [28] | LR (165)  *Child-Pugh A patients* | - TS > 7 cm was a prognostic factor of poor OS (HR, 1.59; 95% CI, 1.05-2.39; p=0.03). - TS > 7 cm was not a prognostic factor of recurrence. |
| Oba et al, 2014 [29] | LR (796) | - TS* was a prognostic factor of OS (HR, 6.71; 95% CI, 3.50-12.60; p<0.001). |
| Lee et al, 2020 [30] | LR (774) | - TS ≥ 4 cm was a prognostic factor of OS (OR, 1.84; 95% CI, 1.41-2.40; p<0.001). |
| Zhang et al, 2014 [31] | LR (615)  *Solitary HCCs without MaVI* | - TS* was not a prognostic factor of neither OS nor DFS. |
| Lim et al, 2014 [32] | LR (616)  *Solitary HCCs* | - TS > 5 cm was not a prognostic factor of neither DFS nor OS. - The frequency of microvascular invasion, satellite nodules and advanced tumor grade increases with tumor size. However, influence of tumor size on the survival of patient decreased proportionally with the increase in size. |
| Lee et al, 2018 [33] | LR (242) | - TS > 5 cm was not a prognostic factor of OS nor DFS. - Large tumor size was associated with infiltrative tumor type (p<0.001). |
| Lin et al, 2022 [34] | LR (598) | - TS > 5 cm was not a prognostic factor of neither DFS (HR, 1.17; 95% CI, 0.90-1.51; p=0.25) nor OS (HR, 1.09; 95% CI, 0.81-1.47;0.58). |
| Kondo et al, 2005 [35] | LR (110)  *Solitary HCCs* | - TS* was not a prognostic factor of OS (OR, 1.05; 95% CI, 0.90-1.23; p=0.51). - It was found to be larger in the early death group (recurrence within 2 years, p=0.018) than in the survival group. |
| Kluger et al, 2015 [36] | LR (313) | TS >10 cm was not a prognostic factor for neither DFS or OS. |
| Shirabe et al, 2010 [37] | **LT (119)**  *HCCs without MaVi* | TS >5 cm was not a prognostic factor of DFS. |
| Li et al, 2022 [38] | LR (700) | TS* was not a prognostic factor of DFS. |
| He et al, 2015 [39] | LR (144)  *Solitary HCCs* | TS* did not predict OS on univariate analysis. |
| Choi et al, 2011 [40] | LR (100)  - Child-Pugh A patients, with clinically significant PHT (47) | TS > 5 cm did not predict OS on univariate analysis in the PHT subgroup. |
| Zavaglia et al, 2005 [41] | **LT (155)** | TS > 5 cm did not predict OS nor recurrence on univariate analysis. |
| Dupont-Bierre et al, 2005 [42] | LR (69)  *Non-cirrhotic patients* | TS > 8 cm was not a prognostic factor of OS. |

* analyzed as a continuous variable, in centimeters

Abbreviations: LR: liver resection; HCC: hepatocellular carcinoma; MaVI: macroscopic vascular invasion; TS: tumor size; OS: overall survival; LT: liver transplant; BDI: bile duct invasion; DFS: disease-free survival; CSS: cancer-specific survival; PHT: portal hypertension; DSS: disease-specific survival.

**Table S2**. Number of nodules (NoN) and prognosis in hepatocellular carcinoma (HCC)

| Study | Treatment (Number of patients) | Main finding(s) |
| --- | --- | --- |
| Zhang et al, 2022 [1] | LR (698)  *HCCs without MaVi* | - NoN (1 vs. 2 and 1 vs. 3) was a prognostic factor of early recurrence in the training cohort (OR, 1.96; 95% CI, 1.25-3.07; p=0.003 and OR, 2.08; 95% CI, 1.03-4.23; p=0.042). - NoN was included in nomograms that showed predictive accuracy of recurrence in both training and validation cohorts. |
| Pérez-Saborido et al, 2007 [6] | **LT (95)** | NoN > 3 predicted overall and extrahepatic recurrence (p=0.01) and hepatic recurrence (p=0.004) on univariate analysis. |
| Du et al, 2014 [10] | LR (398) | NoN* was a prognostic factor of early recurrence (OR, 1.77; 95% CI, 1.19-2.62; p=0.004). |
| Yamamoto et al, 2015 [8] | LR (404)  - Recurrence-free patients after 17 months (252) | - NoN* was a prognostic factor of early recurrence after initial hepatectomy (RR, 2.63; 95%CI, 1.55-4.44; p<0.001). - It did not predict late recurrence. - NoN* was a prognostic factor of 5-year OS after initial recurrence (RR, 1.53; 95% CI, 1.07-2.20; p=0.02). |
| Xu et al, 2019 [12] | LR (734) | NoN* was a prognostic factor of late recurrence (HR, 1.56; 95% CI, 1.14-2.14; p=0.006). |
| Welling et al, 2018 [7] | **LT (441)** | NoN* on explant was not a prognostic factor of recurrence. |
| Parfitt et al, 2007 [4] | **LT (75)** | NoN* did not predict recurrence on univariate analysis. |
| D’Amico et al, 2009 [11] | **LT (479)** | NoN* was not a prognostic factor of recurrence after LT (HR, 1.07; 95% CI, 0.91-1.22; p=0.40). |
| Zavaglia et al, 2005 [41] | **LT (155)** | - NoN* did not predict OS nor recurrence on univariate analysis. |
| Shimada et al, 2007 [21] | LR (319) | - NoN* was a prognostic factor of DFS (HR, 1.84; 95% CI, 1.35–2.51; p<0.001). - It did not predict OS after recurrence on univariate analysis. |
| Sumie et al, 2014 [22] | LR (207) | - Multiple nodules (2-3) were a prognostic factor of DFS (HR, 1.68; 95% CI, 1.13-2.51; p=0.011). - It did not predict DSS. |
| Lee et al, 2017 [24] | LR (520)  **LT (338)**  - AJCC Stage I-II HCCs (710) | NoN* (HR, 1.44; 95% CI, 1.15-1.80; p=0.001) was a prognostic factor of DFS for stage I-II HCCs. |
| Meng et al, 2014 [14] | LR (413) | - NoN ≥ 2 was a prognostic factor of OS (RR, 1.6; 95% CI 1.2-2.1; p<0.001). - Multiple nodules were predominant in the bile duct invasion group (p=0.006). |
| Vauthey et al, 2002 [15] | LR (557) | - NoN* was a prognostic factor of OS (HR, 1.5; 95% CI, 1.1-1.9; p=0.007). |
| Poon et al, 2003 [16] | LR (542) | - NoN* was a prognostic factor of OS (HR, 1.40; 95% CI, 1.02-1.92; p=0.04). |
| Liu et al, 2016 [17] | LR (549) | - Multiple nodules but ≤ 3 were a prognostic factor of OS (OR, 2.13; 95% CI,1.46-3.12; p<0.001). - It was not a prognostic factor for DFS. |
| Park et al, 2009 [25] | LR (213)  *Child-Pugh A patients meeting Milan criteria* | - NoN > 3 was a prognostic factor of OS (OR, 4.07; 95% CI, 1.51-10.94; p=0.005). - It was not for DFS. |
| Iwatsuki et al, 2000 [26] | **LT (344)** | - NoN (1-2 vs. > 4 and 1-2 vs. 3-4) was a prognostic factor of OS (RR, 1.4; 95% CI, 0.9-2.1; p<0.02 and RR, 2.1; 95% CI, 1.3-3.5; p<0.02). |
| Oba et al, 2014 [29] | LR (796) | NoN* was a prognostic factor of OS (HR, 0.70; 95% CI, 0.56-0.88; p=0.002). |
| Dupont-Bierre et al, 2005 [42] | LR (69)  *Non-cirrhotic patients* | NoN* was a prognostic factor of OS (RR, 3.70; 95% CI, 1.6-8.6; p=0.002) and DFS (RR, 3.20; 95% CI, 1.5-6.6; p=0.003). |
| Pawlik et al, 2005 [43] | LR (300)  *Huge HCCs (>10cm)* | NoN* was a prognostic factor of OS (HR, 2.25; 95% CI, 1-17-4.30; p=0.02). |
| Lee et al, 2020 [30] | LR (774) | NoN* was a prognostic factor of OS (HR, 1.50; 95% CI, 1.13-1.99, p=0.005). |
| Minagawa et al, 2007 [13] | LR (13 566) | NoN* was a prognostic factor of OS (RR, 1.18; 95% CI, 1.12-1.23; p<0.0001). |
| Shah et al, 2007 [20] | **LT (155)** | - NoN* did not predict DFS on univariate analysis.   NoN* was associated with vascular invasion (p<0.001). |
| Tsai et al, 2000 [27] | LR (322) | - NoN* was a prognostic factor of OS (RR, 1.36; p=0.05). - It correlated with the incidence of venous invasion (p<0.001). |
| Kluger et al, 2015 [36] | LR (313) | - NoN* was not a prognostic factor for neither DFS or OS. |
| Shirabe et al, 2010 [37] | **LT (119)** | NoN > 3 was not a prognostic factor of DFS. |
| Choi et al, 2011 [40] | LR (100)  - Child-Pugh A patients, with clinically significant PHT (47) | NoN* was not a prognostic factor of OS in the PHT subgroup. |

* single vs. multiple, analyzed as a categorial variable

Abbreviations: LR: liver resection; TN: tumor number (number of tumors); HCC: hepatocellular carcinoma; MaVI: macroscopic vascular invasion; LT: liver transplant; DFS: disease-free survival; OS: overall survival; DSS: disease-specific survival; PHT: portal hypertension

**Table S3**. Macroscopic vascular invasion (MaVI) and prognosis in hepatocellular carcinoma

| Study | Treatment (Number of patients) | Variable(s) | Main finding(s) |
| --- | --- | --- | --- |
| Du et al, 2014 [10] | LR (398) | Vascular invasion (venous macro and/or micro) | Vascular invasion was a prognostic factor of early recurrence (OR, 1.45; 95% CI, 1.14-1.84; p=0.002). |
| D’Amico et al, 2009 [11] | **LT (479)** | MaVI* | MaVI was a prognostic factor of recurrence (HR, 1.58; 95% CI, 1.17-2.10; p=0.03). |
| Xu et al, 2019 [12] | LR (734) | MaVI* | MaVI was a prognostic factor of late recurrence (HR, 4.63; 95% CI, 2.48-8.67; p<0.001). |
| Zavaglia et al, 2005 [41] | **LT (155)** | MaVI*  (lobar or segmental branches of the portal or hepatic veins) | - MaVI was a prognostic factor of OS (HR, 2.8; 95% CI, 1.2-6.7; p=0.02). - It predicted recurrence on univariate analysis (HR, 18.9; p=0.000007). |
| Shetty et al, 2004 [44] | **LT (109)** | MaVI* | - MaVI was a prognostic factor of recurrence (HR, 12.87; 95% CI, 3.68-44.95; p<0.0001). - MaVI was a prognostic factor of OS (HR 8.11; 95% CI, 2.52-26.08; p=0.0004). |
| Minagawa et al, 2007 [13] | LR (13 566) | Vascular invasion*  (portal or hepatic veins) | Vascular or bile duct invasion was a prognostic factor of OS (RR, 1.36; 95% CI, 1.29-1.43; p<0.0001). |
| Liu et al, 2016 [17] | LR (549) | MaVI* | - MaVI was a prognostic factor of OS (OR, 1.66; 95% CI, 1.1-2.5; p=0.017). - It was not a prognostic factor of DFS. |
| Tsai et al, 2000 [27] | LR (322) | MaVI*  (major branches of the portal or hepatic vein) | MaVI was a prognostic factor of OS (RR, 2.35; p<0.001). |
| Lee et al, 2020 [30] | LR (774) | MaVI* | MaVI was a prognostic factor of OS (HR, 2.37; 95% CI, 1.52-3.69; p<0.001). |
| Choi et al, 2011 [40] | LR (100)  - Child-Pugh A patients, with clinically significant PHT (47) | MaVI* | - MaVI was a prognostic factor of OS (OR, 2.85; 95% CI, 0.99-8.17; p=0.05). - In the PHT subgroup, it was a prognostic of OS as well (OR, 3.64; 95% CI, 1.29-10.24; p=0.015). |
| Dupont-Bierre et al, 2005 [42] | LR (69)  *Non-cirrhotic patients* | MaVI* | MaVI was a prognostic factor of OS (RR, 7.77; 95% CI, 1.9-31.1; p=0.004) and DFS (RR, 8.8; 95% CI, 2.3-33.6; p=0.001). |
| Iwatsuki et al, 2000 [26] | **LT (344)** | MaVI* | MaVI was a prognostic factor of TFS (RR, 15; 95% CI, 6.7-33.8; p<0.001) and OS (RR, 3.5; 95% CI, 2.2-5.4; p<0.0001). |
| Pawlik et al, 2005 [45] | LR (300)  *Huge HCCs (>10cm)* | MaVI*  (right or left main branches of portal or hepatic veins) | MaVI was a prognostic factor of OS (HR, 1.71; 95% CI, 1.15- 2.55;p=0.009). |
| Roayaie et al, 2013 [28] | LR (165)  *Child-Pugh A patients* | Extent of invasion:  - main portal vein  - hepatic vein or IVC | - Extent of invasion to hepatic vein or IVC was a prognostic factor of OS (HR, 1.32; 95% CI, 1.03-1.74; p=0.05). - Extent of invasion to main portal vein was not a prognostic factor of OS. - Extent of invasion correlated with 90-day perioperative mortality (p<0.001). - Extent of invasion reported in pathological reports correlated with the ability to detect presence of MaVI on imaging (p=0.001). |
| Yamamoto et al, 2015 [46] | LR (372)  - AJCC Stage I-II HCCs (148) | Portal vein tumor thrombosis  (infiltrating the 2nd branch or beyond the portal vein) | For stages I-II, portal vein tumor thrombosis did not predict 5-year DFS. |
| Park et al, 2009 [25] | LR (213)  *Child-Pugh A patients meeting Milan criteria* | Portal vein invasion* | Portal vein invasion did not predict OS. |
| Kondo et al, 2005 [35] | LR (110)  *Solitary HCCs* | Portal vein invasion* | - Presence of portal vein invasion was more frequently observed in the early death group (recurrence within 2 years, p=0.034). - However, it was not a prognostic factor of OS (OR, 0.81; 95% CI, 0.16-4.30; p=0.81). |
| Shah et al, 2007 [20] | **LT (155)** | MaVI*  (portal or hepatic veins) | - MaVI was a prognostic factor of DFS (HR 54.2; 95% CI, 11.03-266.40; p<0.001). - Vascular invasion was associated with both the number and size of tumors. |
| Vauthey et al, 2002 [15] | LR (557) | MaVI*  (right or left main branches of the portal or hepatic veins) | MaVI was a prognostic factor of OS (HR, 2.1; 95% CI, 1.4-3.3; p<0.001). |
| Poon et al, 2003 [16] | LR (542) | MaVI*  (major branch of portal or hepatic vein) | MaVI was a prognostic factor of OS (HR, 3.11; 95% CI, 1.93-5.05; p<0.001). |
| Kluger et al, 2015 [36] | LR (313) | MaVI* | MaVI was not a prognostic factor for neither DFS or OS. |
| Choi et al, 2009 [47] | LR (497)  - Huge HCC (>10cm) (50) | MaVI* | MaVI was not a prognostic factor of DFS nor OS. |
| Maciel Silva et al, 2022 [48] | LR (161) | Vascular invasion* (micro and macro) | - Vascular invasion was a prognostic factor of DFS (HR, 2.36; 95% CI, 1.13-4.93; p=0.022). - It was not a prognostic factor of OS. |
| Faber et al, 2014 [49] | LR (288)  - Vascular invasion (107) | Vascular invasion (macro- vs. microscopic) | - Vascular invasion was not a prognostic factor of cumulative survival. - In the subgroup of patients with liver cirrhosis, type of vascular invasion did not influence long-term survival. - It was the case in the subgroup without liver cirrhosis (p=0.002). |

* yes vs. no, analyzed as a categorical variable

Abbreviations: LR: liver resection; IVC: inferior vena cava; OS: overall survival; MaVI: macroscopic vascular invasion; AJCC: American Joint Committee on Cancer; HCC: hepatocellular carcinoma; DFS: disease-free survival; LT: liver transplant; TFS: tumor-free survival; PHT: portal hypertension.

**Table S4**. Macroscopic bile duct invasion (MaBDI) and prognosis in hepatocellular carcinoma (HCC)

| Study | Treatment (Number of patients) | Variable(s) | Main finding(s) |
| --- | --- | --- | --- |
| Yu et al, 2011 [50] | LR (676) | BDTT (macro and/or micro) | BDTT was associated with poorer OS (p=0.016). |
| Minagawa et al, 2007 [13] | LR (13 566) | BDI* | Vascular or bile duct invasion predicted the best OS (RR, 1.36; 95% CI, 1.29-1.43; p<0.0001). |
| - **Yang et al, 2018 [51]** | LR (270) | BDI* (macro and micro) | BDI was a prognostic factor of DFS (RR, 2.29; 95% CI, 1.66-3.15; p<0.001).  Patients with MaBDI had worse OS than patients with only microscopic BDI (p=0.008). |
| Meng et al, 2014 [14] | LR (413) | BDI* (macro and micro)  - central (B1)  - peripheral (B2) | - B1 was a prognostic factor of OS (HR, 1.3; 95% CI, 1.1-2.2; p=0.01). - B2 was not a prognostic factor. |
| Oba et al, 2014 [29] | LR (796)  - other treatments (25) | MaBDI* (thrombus in the common hepatic duct or the 1st to 2nd branches of the bile duct). | - MaBDI was not a prognostic factor of OS. - Patients with BDTT undergoing resection had better overall 5-year survival rates than BDTT patients who underwent other treatments (p<0.001). |
| Esaki et al, 2005 [52] | LR (38) | MaBDI* (thrombus in no more than the second order branch, i.e., in the common bile duct, the right or left main hepatic duct, or the second order branch of the intrahepatic bile duct) | MaBDI was a prognostic factor of **favorable** prognosis (HR, 0.27; 95% CI, 0.11-0.67; p=0.005). |

* yes vs. no, analyzed as a categorical variable

Abbreviations: LR: liver resection; BDTT: bile duct tumor thrombus; OS: overall survival; BDI: bile duct invasion; DFS: disease-free survival; MaBDI: macroscopic bile duct invasion.

**Table S5**. Growth pattern (GP) and prognosis in hepatocellular carcinoma (HCC)

| Study | Treatment (Number of patients) | Variable(s) | Main finding(s) |
| --- | --- | --- | --- |
| Hui et al, 2000 [53] | LR (65) | GC (LCSG)  - SN  - SNEG  - CMN | - GC was a prognostic factor of recurrence (RR, 2.12; 95% CI, 1.31-3.42; p=0.002) and DSS (RR, 2.97; 95% CI, 1.23-7.20; p=0.03). |
| Rhee et al, 2020 [54] | LR (266) | GC (LCSG)  - VN  - SN  - SNEG  - CMN  - INF | - CMN type was a prognostic factor of early recurrence (<1yr) (HR, 2.61; 95% CI, 1.26–5.41; p=0.010). - INF type as well (HR, 3.62; 95% CI, 1.30-10.05; p=0.014). - GC was associated with capsule formation (p<0.001), microvascular invasion (p<0.001), TNM stage II or III (p=0.004), high stemness related marker (p=0.008), alpha-SMA positive fibrous stroma (>5%, p=0.003) and tumor necrotic area (>30%, p=0.045). |
| He et al, 2015 [39] | LR (144)  *Solitary HCCs* | GC (LCSGJ)  - SN - SNEG  - CMN  - INF | - GC was a prognostic factor of poor OS (RR, 6.56; 95% CI, 1.12-2.37; p=0.01). - INF type had a 51.5% 5-year survival rate whereas the others’ varied between 70-80%. |
| Minagawa et al, 2007 [13] | LR (13 566) | GC (LCSG)  - SN  -non-SN | - Non-SN type was a prognostic factor of poor OS (RR, 1.13; 95% CI, 1.08-1.18; p<0.0001). |
| Lee et al, 2018 [33] | LR (242) | GC (KLCA)  - VN, EN (type I)  - CMN, PN, INF (type II) | - GC was a prognostic factor of poor OS (HR, 4.12; 95% CI, 1.14–14.84; p=0.03) and DFS (HR, 1.62; 95% CI, 1.09-2.40; p=0.016). - Type II HCCs were associated with larger tumor size (p<0.01), poorly differentiated (p=0.01), more frequent microvascular invasion. - Type II HCCS were associated with increased expression of “stemness”- and EMT-related markers (CK19, p=0.002; EpCAM, p=0.009, uPAR, p<0.001; ezrin, p=0.036). - INF type was associated with the worst OS (p=0.015) and DFS (p=0.034). |
| Choi et al, 2011 [40] | LR (100)  - Child-Pugh A patients, with clinically significant PHT (47) | GC (LCSGJ)  - SN  - non-SN | In the PHT subgroup, non-SN type was a prognostic factor of poor OS (OR, 2.72; 95% CI, 1.01-7.3; p=0.047). |
| Ochiai et al, 2012 [5] | LR (264)  - extrahepatic recurrence (26) | GC (LCSGJ)  - SN, SNEG  - CMN, INF, massive (infiltrative) | INF type was not predictive of survival in the extrahepatic recurrence group on univariate analysis. |
| Choi et al, 2009 [47] | LR (497)  - huge HCCs (>10cm) (50) | GC (LCSG)  - SN  - non-SN | In the subgroup of 50 huge HCCs, non-SN type was the only prognostic factor of DFS (RR, 2.89; 95% CI, 1.28-6.59; p=0.011) and poor OS (RR, 2.65; 95% CI, 1.10-6.40; p=0.03). |
| Shirabe et al, 2010 [37] | **LT (119)** | GC (Kanai)  - SN  - SNEG  - CMN | CMN-type was a prognostic factor of DFS (HR, 4.31; 95% CI, 1.04-12.08; p=0.002). |
| Murakata et al, 2011 [55] | LR (275) | GC (Kanai)  - SN  - SNEG  - CMN | - GC was associated with OS (p=0.002) and DFS (p=0.007), the CMN-type being the worst. - EpCAM protein expression was an independent prognostic factor of CM-type (OR, 3.06; 95% CI, 1.32-7.13; p=0.009). |
| Inayoshi et al, 2003 [56] | LR (36) | GC (LCSG)  - SN  - SNEG  - CMN | - SNEG and CM types were associated with worse DFS than SN type HCCs (p=0.04). - SNEG and CM types were associated with lower E-cadherin expression levels than SN type HCCs (p<0.005). |
| Lee et al, 2020 [30] | LR (774) | GC (KLCA)  - EN, PN)  - CMN  - INF | - Infiltrative type was a prognostic factor of OS (HR, 2.03; 95% CI, 1.46-2.84; p<0.001). - In the subgroup with TS>4cm, it was a prognostic factor of OS (HR, 2.18; 95% CI, 1.49–3.18; p<0.001). However, it was not in the subgroup with TS<4cm. |
| Shimada et al, 2001 [56] | LR (404)  *Nodular type HCCs* | GC (LCSG)  - SN  - SNEG  - CMN | - SNEG type was a prognostic factor of OS (RR, 1.65; p<0.0001). - SNEG type showed higher rates of portal vein invasion, intrahepatic metastasis and poorly differentiated histology (all p<0.0001). |
| Lee et al, 2017 [24] | LR (520)  **LT (338)**  - AJCC Stage I-II HCC (710) | GC (KLCA)  - EN, VN, PN  - CMN  - INF | - EN type was more frequent in the LT group compared to LR group (p<0.05). - GC was not a prognostic factor of DFS for stage I-II. |
| Kondo et al, 2005 [35] | LR (110)  *Solitary HCCs* | GC (LCSGJ)  - SN  - SNI  - SNEG  GP  - expanding  - infiltrating | - GC was not a prognostic factor of OS (HR, 1.95; 95% CI, 0.55-6.98; p=0.30). - GP did not predict survival on univariate analysis. |

Abbreviations: LR: liver resection; HCC: hepatocellular carcinoma; GC: gross classification; LCSGJ: Liver Cancer Study Group of Japan; SN: single nodular; SNEG: single nodular with extra-nodular growth; CMN: confluent multinodular; INF: infiltrative; OS: overall survival; KLCA: Korean Liver Cancer Association; VN: vaguely nodular; EN: expanding nodular; PN: nodular with peri-nodular extension; DFS: disease-free survival; PHT: portal hypertension; LT: liver transplant; AJCC: American Joint Committee on Cancer; GP: growth pattern.

**Table S6**. Resection margin (R) and prognosis in hepatocellular carcinoma (HCC)

| Study | Treatment (Number of patients) | Main finding(s) |
| --- | --- | --- |
| Du et al, 2014 [10] | LR (398) | - R* did not predict early nor late recurrence on univariate analysis. |
| Xu et al, 2019 [12] | LR (734) | - R* was not a prognostic factor of late recurrence (p=0.25). |
| Shimada et al, 2007 [21] | LR (319) | - R > 5mm did not predict DFS nor OS after recurrence on univariate analysis. |
| Park et al, 2009 [25] | LR (213)  *Child-Pugh A patients meeting Milan criteria* | - R* was a prognostic factor of OS (OR, 2.21; 95% CI, 1.21-4.05; p=0.01) but not for DFS. |
| Tsai et al, 2000 [27] | LR (322) | - R* was a prognostic factor of OS (RR, 1.24; p=0.03). |
| Zhang et al, 2013 [31] | LR (615)  *Solitary HCCs without MaVI* | - R* was a prognostic factor of OS (HR, 0.53; 95% CI, 0.40-0.70; p<0.001) and DFS (HR, 0.53; 95% CI, 0.42-0.67; p<0.001). |
| Meng et al, 2014 [14] | LR (413)  - BDI group (35) | - R* did not predict OS on univariate analysis. - Patients with BDI had a narrower RM than those without (p=0.034). |
| He et al, 2015 [39] | LR (144)  *Solitary HCCs* | - R (in mm) did not predict OS on univariate analysis. |
| Poon et al, 2003 [16] | LR (542) | - R* was not a prognostic factor of OS. |
| Kondo et al, 2005 [35] | LR (110)  *Solitary HCCs* | - R (in mm) was not a prognostic factor of OS (HR, 0.91; 0.78-1.06; p=0.23). - However, it was narrower in the early death group (recurrence within 2 years, p=0.028). |
| Shi et al, 2007 [57] | LR (169) | - R (in cm) was a prognostic factor of RFS (OR, 0.60; 95% CI, 0.42-0.85; p=0.004). - Survival outcomes (OS) were better in the wide resection margin group (p=0.008). |

* analyzed as a categorical variable, <1 vs. ≥1 centimeter

Abbreviations: LR: liver resection; R: resection margin; DFS: disease-free survival; OS: overall survival; HCC: hepatocellular carcinoma; MaVI: macroscopic vascular invasion; BDI: bile duct invasion.

**Table S7**. Tumor location and prognosis in hepatocellular carcinoma (HCC)

| Study | Treatment (Number of patients) | Main finding(s) |
| --- | --- | --- |
| Poon et al, 2003 [16] | LR (542) | Bilobar tumor was a prognostic factor of OS (HR, 1.66; 95% CI, 1.01-2.74; p=0.045). |
| Iwatsuki et al, 2000 [26] | **LT (344)** | Bilobar tumor was a prognostic factor of TFS (RR, 3.1; 95% CI, 1.7-5.4; p<0.0001). |
| Li et al, 2022 [38] | LR (700) | - Left tumor location was a prognostic factor of DFS (HR, 1.26; 95% CI, 1.00-1.59; p=0.046) and long-term OS (HR, 3.23; 95% CI, 1.28-8.13; p=0.013). - It did not predict short-term OS. |
| Vauthey et al, 2002 [15] | LR (557) | Bilobar tumor did not predict OS on univariate analysis. |
| Shah et al, 2007 [20] | **LT (155)** | Tumor location (uni- vs. bilobar) did not predict DFS on univariate analysis. |
| Zavaglia et al, 2005 [41] | **LT (155)** | Bilobar tumor did not predict OS nor recurrence on univariate analysis. |

Abbreviations: LR: liver resection; OS: overall survival; LT: liver transplant; DFS: disease-free survival; TN: tumor number (number of tumors); HCC: hepatocellular carcinoma; MaVI: macroscopic vascular invasion; LT: liver transplant; DFS: disease-free survival; OS: overall survival; DSS: disease-specific survival; PHT: portal hypertension

**Table S8**. Capsule formation and prognosis in hepatocellular carcinoma (HCC)

| Study | Treatment (Number of patients) | Variable(s) | Main finding(s) |
| --- | --- | --- | --- |
| Kondo et al, 2005 [35] | LR (110)  *Solitary HCCs* | Capsule* (macro and micro) | Tumor encapsulation was not more frequently seen in the early death group (recurrence within 2 years). |
| Tsai et al, 2000 [27] | LR (322) | Capsule* | Tumor encapsulation was not a prognostic factor of OS (RR, 1.09; p=0.40), |

* yes vs. no, analyzed as a categorical variable

Abbreviations: LR: liver resection; HCC: hepatocellular carcinoma; OS: overall survival.

**Table S9**. Satellite nodules and prognosis in hepatocellular carcinoma (HCC)

| PMID | Treatment (Number of patients) | Variable(s) | Main finding(s) |
| --- | --- | --- | --- |
| Kluger et al, 2015 [36] | LR (313) | Satellite nodules* | Satellite nodules were a prognostic factor of OS (HR, 1.69; 95% CI, 1.14-2.50; p=0.009) and DFS (HR, 1.69; 95% CI, 1.20-2.39; p=0.003). |

* yes vs. no, analyzed as a categorical variable

Abbreviations: LR: liver resection; OS: overall survival; DFS: disease-free survival.

**References**

[1] Zhang Y, Lei X, Xu L, Lv X, Xu M, Tang H. Preoperative and postoperative nomograms for predicting early recurrence of hepatocellular carcinoma without macrovascular invasion after curative resection. BMC Surg 2022;22:233.

[2] Jung S-M, Kim JM, Choi G-S, Kwon CHD, Yi N-J, Lee K-W, et al. Characteristics of Early Recurrence After Curative Liver Resection for Solitary Hepatocellular Carcinoma. J Gastrointest Surg 2019;23:304–11.

[3] Roayaie S, Schwartz JD, Sung MW, Emre SH, Miller CM, Gondolesi GE, et al. Recurrence of hepatocellular carcinoma after liver transplant: patterns and prognosis. Liver Transpl 2004;10:534–40.

[4] Parfitt JR, Marotta P, Alghamdi M, Wall W, Khakhar A, Suskin NG, et al. Recurrent hepatocellular carcinoma after transplantation: use of a pathological score on explanted livers to predict recurrence. Liver Transpl 2007;13:543–51.

[5] Ochiai T, Ikoma H, Okamoto K, Kokuba Y, Sonoyama T, Otsuji E. Clinicopathologic features and risk factors for extrahepatic recurrences of hepatocellular carcinoma after curative resection. World J Surg 2012;36:136–43.

[6] Pérez-Saborido B, de los Galanes SJ, Menéu-Díaz JC, Romero CJ, Elola-Olaso AM, Suárez YF, et al. Tumor recurrence after liver transplantation for hepatocellular carcinoma: recurrence pathway and prognostic factors. Transplant Proc 2007;39:2304–7.

[7] Welling TH, Eddinger K, Carrier K, Zhu D, Kleaveland T, Moore DE, et al. Multicenter Study of Staging and Therapeutic Predictors of Hepatocellular Carcinoma Recurrence Following Transplantation. Liver Transpl 2018;24:1233–42.

[8] Yamamoto Y, Ikoma H, Morimura R, Konishi H, Murayama Y, Komatsu S, et al. Optimal duration of the early and late recurrence of hepatocellular carcinoma after hepatectomy. World J Gastroenterol 2015;21:1207–15.

[9] Shah SA, Greig PD, Gallinger S, Cattral MS, Dixon E, Kim RD, et al. Factors associated with early recurrence after resection for hepatocellular carcinoma and outcomes. J Am Coll Surg 2006;202:275–83.

[10] Du Z-G, Wei Y-G, Chen K-F, Li B. Risk factors associated with early and late recurrence after curative resection of hepatocellular carcinoma: a single institution’s experience with 398 consecutive patients. Hepatobiliary Pancreat Dis Int 2014;13:153–61.

[11] D’Amico F, Schwartz M, Vitale A, Tabrizian P, Roayaie S, Thung S, et al. Predicting recurrence after liver transplantation in patients with hepatocellular carcinoma exceeding the up-to-seven criteria. Liver Transpl 2009;15:1278–87.

[12] Xu X-F, Xing H, Han J, Li Z-L, Lau W-Y, Zhou Y-H, et al. Risk Factors, Patterns, and Outcomes of Late Recurrence After Liver Resection for Hepatocellular Carcinoma: A Multicenter Study From China. JAMA Surg 2019;154:209–17.

[13] Minagawa M, Ikai I, Matsuyama Y, Yamaoka Y, Makuuchi M. Staging of hepatocellular carcinoma: assessment of the Japanese TNM and AJCC/UICC TNM systems in a cohort of 13,772 patients in Japan. Ann Surg 2007;245:909–22.

[14] Meng K-W, Dong M, Zhang W-G, Huang Q-X. Clinical characteristics and surgical prognosis of hepatocellular carcinoma with bile duct invasion. Gastroenterol Res Pract 2014;2014:604971.

[15] Vauthey J-N, Lauwers GY, Esnaola NF, Do K-A, Belghiti J, Mirza N, et al. Simplified staging for hepatocellular carcinoma. J Clin Oncol 2002;20:1527–36.

[16] Poon RT-P, Fan S-T. Evaluation of the new AJCC/UICC staging system for hepatocellular carcinoma after hepatic resection in Chinese patients. Surg Oncol Clin N Am 2003;12:35–50, viii.

[17] Liu W, Wang K, Bao Q, Sun Y, Xing B-C. Hepatic resection provided long-term survival for patients with intermediate and advanced-stage resectable hepatocellular carcinoma. World J Surg Oncol 2016;14:62.

[18] Shinkawa H, Tanaka S, Takemura S, Ishihara T, Yamamoto K, Kubo S. Tumor Size Drives the Prognosis After Hepatic Resection of Solitary Hepatocellular Carcinoma Without Vascular Invasion. J Gastrointest Surg 2020;24:1040–8.

[19] el-Assal ON, Yamanoi A, Soda Y, Yamaguchi M, Yu L, Nagasue N. Proposal of invasiveness score to predict recurrence and survival after curative hepatic resection for hepatocellular carcinoma. Surgery 1997;122:571–7.

[20] Shah SA, Tan JCC, McGilvray ID, Cattral MS, Levy GA, Greig PD, et al. Does microvascular invasion affect outcomes after liver transplantation for HCC? A histopathological analysis of 155 consecutive explants. J Gastrointest Surg 2007;11:464–71.

[21] Shimada K, Sakamoto Y, Esaki M, Kosuge T, Morizane C, Ikeda M, et al. Analysis of prognostic factors affecting survival after initial recurrence and treatment efficacy for recurrence in patients undergoing potentially curative hepatectomy for hepatocellular carcinoma. Ann Surg Oncol 2007;14:2337–47.

[22] Sumie S, Nakashima O, Okuda K, Kuromatsu R, Kawaguchi A, Nakano M, et al. The significance of classifying microvascular invasion in patients with hepatocellular carcinoma. Ann Surg Oncol 2014;21:1002–9.

[23] Goh BKP, Teo J-Y, Chan C-Y, Lee S-Y, Jeyaraj P, Cheow P-C, et al. Importance of tumor size as a prognostic factor after partial liver resection for solitary hepatocellular carcinoma: Implications on the current AJCC staging system. J Surg Oncol 2016;113:89–93.

[24] Lee K, Lee K-B, Yi N-J, Suh K-S, Jang J-J. Prognosis of Hepatocellular Carcinoma after Liver Transplantation: Comparative Analysis with Partial Hepatectomy. J Pathol Transl Med 2017;51:79–86.

[25] Park Y-K, Kim B-W, Wang H-J, Kim M-W. Hepatic resection for hepatocellular carcinoma meeting Milan criteria in Child-Turcotte-Pugh class a patients with cirrhosis. Transplant Proc 2009;41:1691–7.

[26] Iwatsuki S, Dvorchik I, Marsh JW, Madariaga JR, Carr B, Fung JJ, et al. Liver transplantation for hepatocellular carcinoma: a proposal of a prognostic scoring system. J Am Coll Surg 2000;191:389–94.

[27] Tsai TJ, Chau GY, Lui WY, Tsay SH, King KL, Loong CC, et al. Clinical significance of microscopic tumor venous invasion in patients with resectable hepatocellular carcinoma. Surgery 2000;127:603–8.

[28] Roayaie S, Jibara G, Taouli B, Schwartz M. Resection of hepatocellular carcinoma with macroscopic vascular invasion. Ann Surg Oncol 2013;20:3754–60.

[29] Oba A, Takahashi S, Kato Y, Gotohda N, Kinoshita T, Shibasaki H, et al. Usefulness of resection for hepatocellular carcinoma with macroscopic bile duct tumor thrombus. Anticancer Res 2014;34:4367–72.

[30] Lee YJ, Lee YR, Seo CG, Goh HG, Kim TH, Yim SY, et al. How Should We Assign Large Infiltrative Hepatocellular Carcinomas for Staging? Cancers (Basel) 2020;12:2589.

[31] Zhang H, Yuan S-X, Dai S-Y, Zhang J-M, Huang X, Lu C-D, et al. Tumor size does not independently affect long-term survival after curative resection of solitary hepatocellular carcinoma without macroscopic vascular invasion. World J Surg 2014;38:947–57.

[32] Lim C, Mise Y, Sakamoto Y, Yamamoto S, Shindoh J, Ishizawa T, et al. Above 5 cm, size does not matter anymore in patients with hepatocellular carcinoma. World J Surg 2014;38:2910–8.

[33] Lee Y, Park H, Lee H, Cho JY, Yoon Y-S, Choi Y-R, et al. The Clinicopathological and Prognostic Significance of the Gross Classification of Hepatocellular Carcinoma. J Pathol Transl Med 2018;52:85–92.

[34] Lin S-H, Eng H-L, Liu Y-W, Lin C-C, Yong C-C, Wang C-C, et al. Characteristics and prognosis of patients with large well-differentiated hepatocellular carcinoma who have undergone resection. Am J Surg 2022;223:339–45.

[35] Kondo K, Chijiiwa K, Makino I, Kai M, Maehara N, Ohuchida J, et al. Risk factors for early death after liver resection in patients with solitary hepatocellular carcinoma. J Hepatobiliary Pancreat Surg 2005;12:399–404.

[36] Kluger MD, Salceda JA, Laurent A, Tayar C, Duvoux C, Decaens T, et al. Liver resection for hepatocellular carcinoma in 313 Western patients: tumor biology and underlying liver rather than tumor size drive prognosis. J Hepatol 2015;62:1131–40.

[37] Shirabe K, Aishima S, Taketomi A, Soejima Y, Uchiyama H, Kayashima H, et al. Prognostic importance of the gross classification of hepatocellular carcinoma in living donor-related liver transplantation. Br J Surg 2011;98:261–7.

[38] Li L, Xu L, Zhou S, Wang P, Zhang M, Li B. Tumour site is a risk factor for hepatocellular carcinoma after hepatectomy: a 1:2 propensity score matching analysis. BMC Surg 2022;22:104.

[39] He J, Shi J, Fu X, Mao L, Zhou T, Qiu Y, et al. The Clinicopathologic and Prognostic Significance of Gross Classification on Solitary Hepatocellular Carcinoma After Hepatectomy. Medicine (Baltimore) 2015;94:e1331.

[40] Choi GH, Park JY, Hwang HK, Kim DH, Kang CM, Choi JS, et al. Predictive factors for long-term survival in patients with clinically significant portal hypertension following resection of hepatocellular carcinoma. Liver Int 2011;31:485–93.

[41] Zavaglia C, De Carlis L, Alberti AB, Minola E, Belli LS, Slim AO, et al. Predictors of long-term survival after liver transplantation for hepatocellular carcinoma. Am J Gastroenterol 2005;100:2708–16.

[42] Dupont-Bierre E, Compagnon P, Raoul J-L, Fayet G, de Lajarte-Thirouard A-S, Boudjema K. Resection of hepatocellular carcinoma in noncirrhotic liver: analysis of risk factors for survival. J Am Coll Surg 2005;201:663–70.

[43] Pawlik TM, Delman KA, Vauthey J-N, Nagorney DM, Ng IO-L, Ikai I, et al. Tumor size predicts vascular invasion and histologic grade: Implications for selection of surgical treatment for hepatocellular carcinoma. Liver Transplantation 2005;11:1086–92.

[44] Shetty K, Timmins K, Brensinger C, Furth EE, Rattan S, Sun W, et al. Liver transplantation for hepatocellular carcinoma validation of present selection criteria in predicting outcome. Liver Transpl 2004;10:911–8.

[45] Pawlik TM, Poon RT, Abdalla EK, Zorzi D, Ikai I, Curley SA, et al. Critical appraisal of the clinical and pathologic predictors of survival after resection of large hepatocellular carcinoma. Arch Surg 2005;140:450–7; discussion 457-458.

[46] Yamamoto Y, Ikoma H, Morimura R, Shoda K, Konishi H, Murayama Y, et al. Post-hepatectomy survival in advanced hepatocellular carcinoma with portal vein tumor thrombosis. World J Gastroenterol 2015;21:246–53.

[47] Choi GH, Han DH, Kim DH, Choi SB, Kang CM, Kim KS, et al. Outcome after curative resection for a huge (>or=10 cm) hepatocellular carcinoma and prognostic significance of gross tumor classification. Am J Surg 2009;198:693–701.

[48] Silva JPM, Coelho FF, Cassenote AJF, Jeismann VB, Fonseca GM, Kruger JAP, et al. Preoperative inflammatory markers as prognostic predictors after hepatocellular carcinoma resection: data from a western referral center. BMC Surg 2022;22:329.

[49] Faber W, Stockmann M, Kruschke JE, Denecke T, Bahra M, Seehofer D. Implication of microscopic and macroscopic vascular invasion for liver resection in patients with hepatocellular carcinoma. Dig Surg 2014;31:204–9.

[50] Yu X, Xu L, Liu C, Zhang R, Wang J. Clinicopathological characteristics of 20 cases of hepatocellular carcinoma with bile duct tumor thrombi. Dig Dis Sci 2011;56:252–9.

[51] Yang X, Qiu Z, Ran R, Cui L, Luo X, Wu M, et al. Prognostic importance of bile duct invasion in surgical resection with curative intent for hepatocellular carcinoma using PSM analysis. Oncol Lett 2018;16:3593–602.

[52] Esaki M, Shimada K, Sano T, Sakamoto Y, Kosuge T, Ojima H. Surgical results for hepatocellular carcinoma with bile duct invasion: a clinicopathologic comparison between macroscopic and microscopic tumor thrombus. J Surg Oncol 2005;90:226–32.

[53] Hui AM, Takayama T, Sano K, Kubota K, Akahane M, Ohtomo K, et al. Predictive value of gross classification of hepatocellular carcinoma on recurrence and survival after hepatectomy. J Hepatol 2000;33:975–9.

[54] Rhee H, Chung T, Yoo JE, Nahm JH, Woo HY, Choi GH, et al. Gross type of hepatocellular carcinoma reflects the tumor hypoxia, fibrosis, and stemness-related marker expression. Hepatol Int 2020;14:239–48.

[55] Murakata A, Tanaka S, Mogushi K, Yasen M, Noguchi N, Irie T, et al. Gene Expression Signature of the Gross Morphology in Hepatocellular Carcinoma. Annals of Surgery 2011;253:94–100.

[56] Shimada M, Rikimaru T, Hamatsu T, Yamashita Y, Terashi T, Taguchi K, et al. The role of macroscopic classification in nodular-type hepatocellular carcinoma. Am J Surg 2001;182:177–82.

[57] Shi M, Guo R-P, Lin X-J, Zhang Y-Q, Chen M-S, Zhang C-Q, et al. Partial hepatectomy with wide versus narrow resection margin for solitary hepatocellular carcinoma: a prospective randomized trial. Ann Surg 2007;245:36–43.
